# Supplementary material
Source: PubMed Central journal article supplement (PMC7885167)
Supplement: NIHMS1621443-supplement-Supplement.pdf [file NIHMS1621443-supplement-Supplement.pdf]

# Anesthesia and Adenotonsillectomy for OSA

The goal of this survey is to summarize your typical management of an otherwise healthy child who has severe obstructive sleep apnea.

We would like to assess current practices by pediatric anesthesiologists.

Thank you for your participation!

Please click on **SUBMIT** at the end of the survey to save your responses.

A 6.5 year old boy with severe sleep apnea presents for adenotonsillectomy. He has a sleep study showing an AHI of 15 and oxygen saturation nadir of 89%. This is interpreted as severe sleep apnea in your institution. He has a normal BMI and is otherwise healthy.

The following questions relate to your usual management of this patient for his surgery.

- 1 After conversation with his parents, it is apparent that he would benefit from pre-med. How would you approach this?
- Oral Midazolam  
 IV Midazolam  
 No pre-med  
 No pre-med, and parent present at induction  
 Other

Your typical midazolam dose in mg/kg for this child:

\_\_\_\_\_

Other pre-med drug and dose (mg/kg):

\_\_\_\_\_

- 2 If this child had moderate sleep apnea (AHI between 5 and 10) would you change the pre-med or its dosage?
- Yes  
 No

For moderate OSA in this child your typical pre-med and dosage mg/kg would be:

\_\_\_\_\_

- 3 What route of induction would you typically use for a normal weight 6.5 year old child with severe OSA?
- Inhalation induction  
 IV induction  
 Other

What is the "other" type of induction you would use for this child? Please include medication and dosage if relevant.

\_\_\_\_\_

- 4 Would you usually use nitrous oxide for induction in this normal weight 6.5 year old with severe sleep apnea ?
- Yes, typically  
 Sometimes  
 No

- 5 Which intra-op narcotic(s) would you typically use for a normal weight 6.5 year old child with severe OSA?
- Fentanyl  
 Morphine  
 Hydromorphone  
 Other  
 None

What would be your typical Fentanyl dose in mg/kg for this child?

\_\_\_\_\_

What would be your typical Morphine dose in mg/kg for this child? \_\_\_\_\_

What would be your typical Hydromorphone dose in mg/kg for this child? \_\_\_\_\_

What other intra-op narcotic would you typically use for this child? Please tell us the drug and mg/kg dose. \_\_\_\_\_

- 6 Compared to a similar weight and age child WITHOUT OSA, your typical intra-op narcotics dose for this child with SEVERE OSA would be:
- The same  
 Higher  
 Lower

- 7 Which intra op anesthetic gases would you typically use for a normal weight 6.5 year old child with severe OSA?
- Sevoflurane  
 Desflurane  
 Other

The "other" anesthetic gas you would typically use for a normal weight 6.5 year old child with severe OSA: \_\_\_\_\_

- 8 Do you typically use IV dexamethasone during adenotonsillectomy for a 6.5 year old normal weight child with severe OSA?
- Yes  
 No  
 I would typically use another steroid

The typical dexamethasone dose you would use for a 6.5 year old normal weight child with OSA is:

- < 0.2mg/kg  
 Between 0.49 mg/kg and 0.2 mg/kg  
 0.5 mg/kg  
 >0.5 mg/kg

What is the other steroid you would use in this case? Please indicate the drug name and usual dose in mg/kg. \_\_\_\_\_

- 9 Would you typically give glycopyrrolate during adenotonsillectomy for a 6.5 year old normal weight child with severe OSA?
- Yes, typically  
 Sometimes  
 No

What dose of glycopyrrolate would you typically use?

- < 0.01 mg/kg  
 0.01 mg/kg  
 >0.01 mg/kg

- 10 Would you typically give ondansetron during adenotonsillectomy for a 6.5 year old normal weight child with severe OSA?
- Yes, typically  
 Sometimes  
 No

- 11 Would you typically give IV acetaminophen during adenotonsillectomy for a 6.5 year old normal weight child with severe OSA?
- Yes, typically  
 Sometimes  
 No

What dose of IV acetaminophen would you typically use?

- Less than 10 mg/kg  
 10 mg/kg  
 11 mg/kg to 14 mg/kg  
 15 mg/kg or more

- 12 Would you typically give IV NSAIDS during adenotonsillectomy for a 6.5 year old normal weight child with severe OSA?
- Yes, typically  
 Sometimes  
 No

What is the name and dose (mg/kg) of the IV NSAID you typically use?

\_\_\_\_\_

- 13 What would be your typical extubation practice in a 6.5 year old normal weight child with severe OSA?
- Usually extubate them deep  
 Usually extubate them awake  
 Keep endotracheal tube in place to PACU and then extubate awake  
 Other

What is your typical "other" extubation practice?

\_\_\_\_\_

- 14 What would make you cancel this case? Please check all that apply.
- Fever  
 Rhinorrhea  
 Non-productive cough  
 Productive cough  
 Wheezing  
 Other

What is your "other" reason for cancelling?

\_\_\_\_\_

- 15 In the PACU (Recovery Room), would you typically use narcotics for this 6.5 year old normal weight patient with severe OSA?
- Yes, typically  
 Sometimes  
 No

In the PACU, which narcotics would you typically use for a normal weigh 6.5 year old child with severe OSA?

- Fentanyl  
 Morphine  
 Hydromorphone  
 Other

What fentanyl dose in mg/kg would you typically use for a normal weight 6.5 year old child with severe OSA in the PACU?

\_\_\_\_\_

What morphine dose in mg/kg and route would you typically use for a normal weight 6.5 year old child with severe OSA in the PACU?

\_\_\_\_\_

What hydromorphone dose in mg/kg and route would you use in the PACU for a normal weight 6.5 year old child with severe OSA?

\_\_\_\_\_

What "other" narcotic would you use in the PACU for a normal weight 6.5 year old child with severe OSA? Please include drug name, dose mg/kg and route.

\_\_\_\_\_

- 16 Do you routinely use oxygen supplementation in the PACU for children with severe OSA?
- Yes, typically  
 Sometimes  
 No

- 17 Do you typically have other standard PACU medications for children with severe OSA? Please check all that you would consider routinely used in your practice.
- Acetaminophen  
 Ibuprofen  
 Ondansetron  
 Glycopyrrolate  
 Dexamethasone  
 Other

What is your "other" standard PACU medication for children with severe OSA?

\_\_\_\_\_

- 18 If this 6.5 year old child with severe sleep apnea instead had a BMI of 32 (obese), would you do anything differently?
- Yes  
No

- 19 Where would you change your usual protocol if this child with severe OSA were also obese?
- Pre-med  
 Induction  
 Intra-op medications  
 Extubation  
 PACU or Recovery Room

If this child were obese, how would you change your pre-med routine?

\_\_\_\_\_

If this child were obese, how would you change your induction routine?

\_\_\_\_\_

If this child were obese, how would you change your intra-op medication routine?

\_\_\_\_\_

If this child were obese, how would you change your extubation routine?

\_\_\_\_\_

If this child were obese, how would you change your PACU or Recovery Room routine?

\_\_\_\_\_

- 19 Do you use ideal or actual body weight to dose pre-medications in obese children?
- Ideal body weight  
Actual body weight  
Other

- 20 Do you use ideal or actual body weight to dose narcotics in obese children?
- Ideal body weight  
Actual body weight  
Other

- 21 Do you have standard guidelines for pre-op, intra-op and post-op management of children with OSA undergoing adenotonsillectomy at your institution?
- Yes  
No  
Not sure

Your demographics:

How many years have you been in practice?

< 5 years  
Between 5 and 10 years  
More than 10 years

---

Your main work environment is:

- Free standing surgery center
- General hospital
- Children's hospital within a general hospital
- Free standing children's hospital
- Other

---

Do you participate in resident teaching in the OR?

- Yes
- No

---

How often do you encounter children with OSA in your practice?

- Rarely or never
- A few times per year
- At least 1 per month
- At least 1 per week
- Daily

---

How comfortable are you managing children with severe OSA? Please slide the marker on the scale to indicate your comfort level.

Not comfortable  
at all

Somewhat  
comfortable

Completely  
comfortable

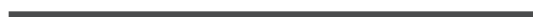

*(Place a mark on the scale above)*

---

Your comments are welcome! Thank you for participating in this survey.
